# Supplementary material for: Opportunities and Barriers of Telemedicine in Rheumatology: A Participatory, Mixed-Methods Study
Source: MDPI journal article supplement (doi:10.3390/ijerph182413127), 2021-12-13
Supplement: s1 [file s1]

**Expert interviews: Interview guide**

Telemedicine in rheumatology

**Entry**

1. Personal introduction and presentation of the context
  - Study funding by Novartis Pharma GmbH: free research, no influence on content
2. Content
  - Rheumatologic care; process of care; potential integration of telemedicine concepts into rheumatologic care.
  - Time frame: Approximately 1 to 1.5 hours; break/ termination possible at any time
3. Audio recording, anonymization, consent sheet

**Table S1: Qualitative Interviews: Interview guide - translated from German**

|    | <b>Guiding question / narrative impulse</b> | <b>Check aspects</b>                                                                                                                                                                                                                                                                                                                                             | <b>Concretizing questions</b>                                                                                                                                                                                                                                                                                                                                                                                                                                                                                                                                                                                                                                                                                                                                                                                                                                                                       | <b>Questions to maintain the conversation</b>                                                                                                                                                     |
|----|---------------------------------------------|------------------------------------------------------------------------------------------------------------------------------------------------------------------------------------------------------------------------------------------------------------------------------------------------------------------------------------------------------------------|-----------------------------------------------------------------------------------------------------------------------------------------------------------------------------------------------------------------------------------------------------------------------------------------------------------------------------------------------------------------------------------------------------------------------------------------------------------------------------------------------------------------------------------------------------------------------------------------------------------------------------------------------------------------------------------------------------------------------------------------------------------------------------------------------------------------------------------------------------------------------------------------------------|---------------------------------------------------------------------------------------------------------------------------------------------------------------------------------------------------|
| 1. | How could rheumatology care be improved?    | <ul style="list-style-type: none"> <li>- Rheumatology care</li> <li>- Patient-doctor relationship</li> <li>- Communication with the patients</li> <li>- Communication with other service providers</li> <li>- Decision making</li> <li>- Patient preferences</li> <li>- Optimization potentials</li> <li>- Quality of supply</li> <li>- Waiting times</li> </ul> | <ul style="list-style-type: none"> <li>- Do you see any challenges in rheumatology care?</li> <li>- What would impede the care process?</li> <li>- Has anything changed in care over the last five years? <ul style="list-style-type: none"> <li>o Challenges / improvements</li> </ul> </li> <li>- What is your assessment of the patient perspective on rheumatology care?</li> <li>- Is rheumatology care already cut to the patient's wishes?</li> <li>- What could make care more patient-centred?</li> <li>- How could health care provider exchanges be improved?</li> <li>- How could communication with patients be improved?</li> <li>- How are care-related decisions made?</li> <li>- What would make your job easier?</li> <li>- Can you think of alternatives to your current care? What would they look like?</li> <li>- What constitutes good rheumatology care for you?</li> </ul> | <p>Could you please give an example of this?</p> <p>Can you please elaborate on that?</p> <p>How do you see it?</p> <p>In what way does this become clear?</p> <p>How do you experience this?</p> |

**Table S1: Qualitative Interviews: Interview guide - translated from German**

|    | <b>Guiding question / narrative impulse</b>                                                                             | <b>Check aspects</b>                                                                                                                                                                                                              | <b>Concretizing questions</b>                                                                                                                                                                                                                                                                                                                                                                                                                                                                                                                                                                                                                                                                                                                                                                                        | <b>Questions to maintain the conversation</b>                                                                                                                                                     |
|----|-------------------------------------------------------------------------------------------------------------------------|-----------------------------------------------------------------------------------------------------------------------------------------------------------------------------------------------------------------------------------|----------------------------------------------------------------------------------------------------------------------------------------------------------------------------------------------------------------------------------------------------------------------------------------------------------------------------------------------------------------------------------------------------------------------------------------------------------------------------------------------------------------------------------------------------------------------------------------------------------------------------------------------------------------------------------------------------------------------------------------------------------------------------------------------------------------------|---------------------------------------------------------------------------------------------------------------------------------------------------------------------------------------------------|
| 2. | <p>What do you understand by telemedicine?</p> <p>Could you please describe?</p> <p>There is no right and no wrong!</p> | <ul style="list-style-type: none"> <li>- Potentials of telemedicine</li> <li>- TM risks</li> <li>- TM experience</li> <li>- Integration into RMD care</li> <li>- Information</li> <li>- Implementation of telemedicine</li> </ul> | <ul style="list-style-type: none"> <li>- Have you already gained experience with telemedicine approaches?</li> <li>- <i>Narrowly speaking, calling a colleague can already be referred to as "telemedicine"</i></li> <li>- What did these approaches involve?</li> <li>- Do you think telemedicine can contribute to improved rheumatology care? If so, how?</li> <li>- Where could it be used?</li> <li>- What are risks of telemedicine?</li> <li>- What are the barriers of telemedicine use?</li> <li>- Where do you inform yourself about telemedicine approaches?</li> <li>- How do you assess the role of telemedicine approaches in standard rheumatology care <u>today</u>?</li> <li>- How do you assess the role of telemedicine approaches in standard rheumatology care in the <u>future</u>?</li> </ul> | <p>Could you please give an example of this?</p> <p>Can you please elaborate on that?</p> <p>How do you see it?</p> <p>In what way does this become clear?</p> <p>How do you experience this?</p> |

**Table S1: Qualitative Interviews: Interview guide - translated from German**

**Conclusion**

- Inform the interviewee that the interview is about to end, or use this section if the interviewee signals that the interview is ending.
- If request for anonymization: Demographic data (see below).
- Re-emphasize privacy, assure that all information will be kept confidential if needed
- Express gratitude and appreciation for the time, effort, and burden resulting from the conversation
- Point out to contact details on the information sheet for possible questions

**Demographics:**

|                                  |         |
|----------------------------------|---------|
| Age:                             | Gender: |
| Role:                            | Date:   |
| Have you ever used telemedicine? |         |

**Table S2. Survey sample characteristics**

**Table.** Survey Sample Characteristics

|                                          | <b>Total</b> |
|------------------------------------------|--------------|
| <b>Gender</b>                            | 708          |
| Female                                   | 507 (71.6%)  |
| Male                                     | 201 (28.4%)  |
| <b>Age</b>                               | 734          |
| <20 years                                | 35 (4.8%)    |
| 20-40 years                              | 104 (14.2%)  |
| 50-60 years                              | 275 (37.5%)  |
| 60-80                                    | 290 (39.5%)  |
| >80 years                                | 30 (4.1%)    |
| <b>RMD-Diagnosis (selection)</b>         | 734          |
| Rheumatoid Arthritis                     | 318 (46.4%)  |
| Osteoarthritis                           | 163 (23.8%)  |
| Psoriasis Arthritis                      | 94 (13.7%)   |
| Osteoporosis                             | 81 (11.8%)   |
| Fibromyalgia                             | 47 (6.9%)    |
| Spondylarthritis                         | 43 (6.3%)    |
| Collagenosis and vasculitis              | 20 (2.9%)    |
| Other Disease (free form)                | 95 (13.9%)   |
| <b>Health Status</b>                     | 696          |
| Very good                                | 12 (1.7%)    |
| Good                                     | 43 (6.2%)    |
| Okay                                     | 316 (45.4%)  |
| Bad                                      | 275 (39.5%)  |
| Very Bad                                 | 50 (7.2%)    |
| <b>Place of residence</b>                | 691          |
| City                                     | 141 (20.4%)  |
| Town                                     | 143 (20.7%)  |
| Provincial town                          | 170 (24.6%)  |
| Rural area                               | 237 (34.3%)  |
| <b>Distance to Rheumatology Practice</b> | 715          |
| > 10 km                                  | 247 (34.6%)  |
| 10-20 km                                 | 145 (20.3%)  |
| 20-30 km                                 | 110 (15.4%)  |
| 30-40 km                                 | 92 (12.9%)   |
| 40-50 km                                 | 39 (5.5%)    |
| 50-60km                                  | 27 (3.8%)    |
| < 60 km                                  | 55 (7.7%)    |
| <b>Distance to GP Practice</b>           | 715          |
| > 5 km                                   | 501 (69.1%)  |
| 5-10 km                                  | 120 (16.6%)  |
| 10-15 km                                 | 54 (7.5%)    |
| 15-20 km                                 | 23 (3.2%)    |

**Table S2. Survey sample characteristics**

|                                |             |
|--------------------------------|-------------|
| 20-25 km                       | 10 (1.4%)   |
| 25-30 km                       | 9 (1.2%)    |
| < 30 km                        | 8 (1.1%)    |
| <b>Personal Devices</b>        | 727         |
| Telephone                      | 628 (86.4%) |
| Personal Computer              | 461 (63.4%) |
| Smartphone                     | 412 (56.7%) |
| Mobile Phone                   | 410 (56.4%) |
| Tablet                         | 254 (34.9%) |
| Fax Machine                    | 100 (13.8%) |
| Activity Tracker (bracelet)    | 90 (12.4%)  |
| Smartwatch                     | 40 (5.5%)   |
| None                           | 1 (0.14%)   |
| <b>Internet Access at home</b> | 729         |
| Yes                            | 613 (84.1%) |
| No                             | 116 (15.9%) |

**Table S3. Technology use in health care****Table.** Technology use in health care.

|                                                                                               | <b>Total</b> |
|-----------------------------------------------------------------------------------------------|--------------|
| <b>“Which of the devices have you previously used to contact your doctor?”</b>                | <b>714</b>   |
| Telephone                                                                                     | 566 (79.3%)  |
| E-Mail                                                                                        | 166 (23.2%)  |
| None so far                                                                                   | 132 (18.5%)  |
| Fax machine                                                                                   | 49 (6.9%)    |
| Chat                                                                                          | 30 (4.2%)    |
| SMS                                                                                           | 15 (2.1%)    |
| Video consultation                                                                            | 2 (0.3%)     |
| <b>“Have you ever searched for information about your rheumatic disease on the Internet?”</b> | <b>721</b>   |
| Yes                                                                                           | 467 (65.6%)  |
| No                                                                                            | 254 (35.7%)  |
| <b>“How satisfied were you with the information provided?”</b>                                | <b>538</b>   |
| 1 (Very satisfied)                                                                            | 83 (15.4%)   |
| 2                                                                                             | 166 (30.9%)  |
| 3                                                                                             | 173 (32.2%)  |
| 4                                                                                             | 65 (12.1%)   |
| 5                                                                                             | 39 (7.2%)    |
| 6 (Not satisfied at all)                                                                      | 12 (2.2%)    |
| <b>“Did you ever visit the website of your rheumatology practice?”</b>                        | <b>708</b>   |
| Yes                                                                                           | 177 (25.0%)  |
| No                                                                                            | 505 (71.3%)  |
| My rheumatology practice has no website                                                       | 26 (3.7%)    |

**Table S4. Recommendations to overcome barriers to telemedicine implementation in rheumatology**

**Table.** Recommendations to overcome barriers to telemedicine implementation in rheumatology

|                                                    | <b>Recommendations to overcome barriers to telemedicine implementation in rheumatology</b>                                                                                                                                                                                                                                                                                                                                                                                                                                                                 |
|----------------------------------------------------|------------------------------------------------------------------------------------------------------------------------------------------------------------------------------------------------------------------------------------------------------------------------------------------------------------------------------------------------------------------------------------------------------------------------------------------------------------------------------------------------------------------------------------------------------------|
| <b>Macro level</b><br>Politics / legislation       | <ul style="list-style-type: none"> <li>- Expansion of digital infrastructure (e.g., in Germany: Broadband expansion, enhanced network coverage)</li> <li>- Promotion and funding of digital transformation in medical practices and hospitals: especially training and further education as well as infrastructure and technical equipment</li> </ul>                                                                                                                                                                                                      |
| <b>Meso level</b><br>Healthcare system / IT sector | <ul style="list-style-type: none"> <li>- Information and education offers for patients as well as health care professionals</li> <li>- Promoting interoperability / standardization of interfaces</li> <li>- Adequate remuneration arrangements</li> <li>- Well-balanced and transparent data security concepts (incl. low-threshold information for users)</li> <li>- (Dissemination and circulation of) Guidelines for low threshold implementation of telemedicine</li> <li>- Training and involvement of dedicated telemedicine specialists</li> </ul> |
| <b>Micro level</b><br>Patient / physician          | <ul style="list-style-type: none"> <li>- Implementation of hybrid concepts for virtual/on-site care</li> <li>- Feedback loops during telemedicine care: via chat, phone, email / dedicated and trained health professionals or automated systems, as appropriate</li> <li>- One does not fit all: Implementation of triage mechanisms in order to offer personalised and need adapted telemedicine approaches</li> <li>- Actual realization of further education and training by health care practitioners</li> </ul>                                      |
